**Title:** Adenosine triphosphate Binding Cassette subfamily C member 1 (ABCC1) overexpression reduces APP processing and increases alpha- versus beta-secretase activity, *in vitro*.

**Authors:** Wayne M. Jepsen [1,2,3,4], Matthew De Both [1], Ashley L. Siniard [1,2], Keri Ramsey [1,2], Ignazio S. Piras [1,4], Marcus Naymik [1,2], Adrienne Henderson [1], Matthew J. Huentelman\* [1,2,3,4]

1. *Neurogenomics Division, Translational Genomics Research Institute, Phoenix, AZ, USA*

2. *Center for Rare Childhood Disorders, Translational Genomics Research Institute, Phoenix, AZ, USA*

3. *School of Life Sciences, Arizona State University, Tempe, AZ, USA*

4. *Arizona Alzheimer's Consortium, Phoenix, AZ, USA*

**\*Corresponding Author:**

Matthew Huentelman, Ph.D.

Professor, Neurogenomics Division

Translational Genomics Research Institute

445 N Fifth Street

Phoenix, AZ 85004

Phone: (602) 748-3128

**Contributions:**

Wayne M. Jepsen designed, carried-out, and analyzed the experiments, as well as wrote the manuscript.

Matthew De Both assisted with the analyses.

Ashley L. Siniard contributed to the acquisition of data.

Keri Ramsey contributed to the acquisition of data.

Ignazio S. Piras assisted with the analyses.

Marcus Naymik assisted with the analyses.

Adrienne Henderson contributed to the acquisition of data.

Matthew J. Huentelman is the principal investigator and guarantor of the work.

## Abstract:

The organic anion transporter Adenosine triphosphate Binding Cassette subfamily C member 1 (*ABCC1*), also known as *MRP1*, has been demonstrated in murine models of Alzheimer's disease (AD) to export amyloid beta (A $\beta$ ) from the endothelial cells of the blood-brain barrier to the periphery, and that pharmaceutical activation of *ABCC1* can reduce amyloid plaque deposition in the brain. Here, we show that *ABCC1* is not only capable of exporting A $\beta$  from the cytoplasm of human cells, but also that its overexpression significantly reduces A $\beta$  production and increases the ratio of alpha- versus beta-secretase mediated cleavage of the Amyloid Precursor Protein (APP), likely via indirect modulation of alpha-, beta-, and gamma-secretase activity.

## Background:

Alzheimer's disease (AD) is the sixth leading cause of death in the United States, and no current treatment exists that can effectively prevent or slow progression of the disease. For this reason, it is imperative to identify novel drug targets that can dramatically alter the physiological cascades that lead to neuronal cell death resulting in dementia and ultimately loss of life.

The deposition of aggregated amyloid beta (A $\beta$ ) in the brain is one of the major pathological hallmarks of AD, and A $\beta$  species result from the differential cleavage of the Amyloid Precursor Protein (APP) (Selkoe and Hardy, 2016). APP is a single-pass transmembrane protein that is highly expressed in the brain and can be cleaved by a variety of secretases to produce unique peptide fragments, the two major pathways of which are known as the alpha- and beta-secretase pathways (Selkoe and Hardy, 2016). Cleavage by an alpha-secretase releases the soluble APP alpha (sAPP $\alpha$ ) fragment from the membrane into the extracellular space, which has been shown to be neuroprotective and increase neurogenesis, *in vitro* (Ohsawa *et al.*, 1999), as well as play a positive role in synaptic plasticity (Ring *et al.*, 2007; Hick *et al.*, 2015) and memory formation (Bour *et al.*, 2004). Alpha-secretase cleavage of APP is the by far the most common cleavage of APP in the brain (Haass and Selkoe, 1993). If, instead, the APP molecule is cleaved by a beta-secretase, soluble APP beta (sAPP $\beta$ ) is released into the extracellular space, and subsequent cleavage of the remaining membrane-bound fragment by the gamma-secretase complex results in the production of A $\beta$ , the peptide that aggregates to form amyloid plaques (Baranello *et al.*, 2015). Because alpha-secretases cleave

APP within the Abeta domain, and beta-secretases cleave within the sAPPalpha domain, APP cleaved by an alpha-secretase cannot be cleaved by a beta-secretase, and vice versa (Haass and Selkoe, 1993), the two pathways are mutually exclusive and stoichiometrically related. It has been hypothesized that decreasing Abeta production could slow progression of AD, and although direct beta-secretase inhibition has failed in clinical trials (Das and Yan, 2019), control of these pathways via pharmaceutical intervention may still prove to be a viable AD treatment.

Our lab investigated the role of *ABCC1* in AD because we identified rare *ABCC1* single nucleotide polymorphisms (SNPs) in a familial case of late-onset AD, and in an early-onset AD patient with no family history of AD. *ABCC1* has been previously shown to export Abeta from the cerebral spinal fluid to the peripheral blood (Krohn *et al.*, 2011), and *Abcc1* knockout mouse models have increased cerebral amyloid plaque deposition and soluble Abeta (Krohn *et al.*, 2011, 2015). Though our final experiments demonstrated no significant difference between the human reference *ABCC1* and either of the mutant alleles, our study revealed that *ABCC1* overexpression results in a significant reduction in extracellular Abeta1-40, Abeta1-42, and sAPPbeta species, while increasing the ratio of alpha- to beta-secretase mediated cleavage of APP, likely via indirect transcriptional modulation of proteins involved in APP metabolism. Our results indicate that *ABCC1* is a valid drug target for the treatment of AD because of its multimodal influence on Abeta deposition: via exportation of Abeta species, as well as modulation of APP processing away from the amyloidogenic pathway.

## Results and Discussion:

Briefly, for the APP metabolite experiments, *ABCC1*-overexpressing cells, or empty vector control cells, were plated at  $1.4 \times 10^7$  cells per well of a 6-well plate weekly, with daily media changes. On the fourth day, supernatant was harvested and clarified, and cells were lysed for RNA or protein extraction. All samples were stored at  $-80^\circ\text{C}$  until 3 weeks of experiments were assayed together. A more complete description of the experimental approach can be found in the Materials and Methods section.

In the first experiment, *ABCC1*-overexpressing cells had a 34.02% decrease in extracellular Abeta1-40 ( $t=11.184$ ,  $df=4$ ,  $p=3.64 \times 10^{-4}$ ) and a 32.85% decrease in extracellular Abeta1-42 ( $t=4.26$ ,  $df=4$ ,  $p=0.013$ ). The second experiment saw a 33.08% decrease in Abeta1-40 ( $t=5.26$ ,  $df=4$ ,  $p=6.26 \times 10^{-3}$ ) and a 43.90% decrease in Abeta1-42 ( $t=3.37$ ,  $df=4$ ,  $p=0.028$ ) (see **Figure 1**). These results were surprising because, as previously

stated, ABCC1 has been shown to export Abeta from the cytoplasm to the extracellular space, and if Abeta is, in fact, a substrate for ABCC1, we would expect to see higher extracellular concentrations of Abeta species.

To test whether ABCC1 exports Abeta, both cell lines were incubated with 200nM fluorescent Abeta1-42 (Beta-Amyloid (1-42), HiLyte Fluor 555-labeled, Human, AnaSpec, Fremont, CA, USA) for 18 hours, and then cells were subject to flow cytometry (FACSCanto II, BD Biosciences, Franklin Lakes, NJ) to quantify the percentage of fluorescent cells. 79.7% of the empty vector control cells were fluorescent, while only 68.4% of ABCC1-overexpressing cells displayed intracellular fluorescence. Furthermore, when incubated with fluorescent Abeta1-42 and 25uM thiethylperazine (MilliporeSigma, Burlington, MA, USA), a small molecule previously shown to increase ABCC1-mediated transport of Abeta (Krohn *et al.*, 2011), we observed a 23.6% decrease in population fluorescence in the empty vector control cells, and an even greater 38.0% decrease in the ABCC1-overexpressing cells (see **Figure 2**). This confirms that our model is working as expected because it agrees with previous reports: that ABCC1 does export Abeta, and that thiethylperazine increases ABCC1 transport activity.

Because we demonstrated that ABCC1 does export Abeta from the cytoplasm to the extracellular space, we hypothesized that ABCC1 may alter transcript levels of proteins capable of altering APP metabolism. To this end, we conducted RNA-sequencing of the cell lines. Analysis revealed 2470 differentially expressed genes (DEGs) with adjusted p-values less than or equal to 0.001, of which 2192 were protein coding. We hypothesized that because of the drastic reduction in extracellular Abeta, if a single gene were responsible for the altered APP processing, that it would have a log base two fold change (log<sub>2</sub>FC) with an absolute value greater than or equal to 1.5, which left 268 genes of interest (GOIs). Each gene was manually researched for their association to Alzheimer's disease and amyloid pathology. This left 55 GOIs, 10 of which have known roles in APP/Abeta metabolism or transport – but whose expression levels are altered in the opposite direction one would expect for the observed ELISA results – and two with expression levels that may account for the lower levels of extracellular Abeta. All GOIs are discussed in **Supplementary Table 1** with a focus on this experiment, and in the context of the proceeding two RNA-seq experiments discussed later.

The genes whose expression levels may account for the reduced extracellular Abeta levels are *CD38* and *TIMP3*. *CD38* encodes the Cluster of Differentiation 38, an enzyme that synthesizes and hydrolyzes cyclic adenosine 5'-diphosphate-ribose, a molecule that regulates intracellular calcium signaling (Chini *et al.*, 2002). It

has been shown that *Cd38* knockout AD mouse models have improved cognitive deficits, decreased cerebral amyloid burden, and that primary neurons cultured from those mice secrete significantly less Abeta species (Blacher *et al.*, 2015). The authors found that knockout of *Cd38* alters beta- and gamma-secretase activity, effectively reducing both (Blacher *et al.*, 2015). This aligns with the observations made in our experiment, that when *CD38* expression is reduced (log2FC=-2.98, N=6, n=3, p=7.21e-09, padj=1.78e-07), extracellular Abeta levels are also reduced. Therefore, the reduction of *CD38* expression may contribute to the altered APP processing, though the mechanism by which *ABCC1* alters *CD38* expression is not known.

*TIMP3*, our second candidate gene, encodes the Tissue Inhibitor of Metalloproteinases 3, a protein that can irreversibly inhibit APP-cleaving alpha-secretases like *ADAM10* and *ADAM17* (Hoe *et al.*, 2007). *TIMP3* expression is also reduced in AD brain tissue (Dunckley *et al.*, 2006), which may play a role in increased Abeta production. In our experiment, we saw *TIMP3* expression reduced with a log2FC of -1.95 in the *ABCC1*-overexpressing cell line compared to the empty vector control (N=6, n=3, p=2.54e-110, padj=7.56e-107). Logically, if an alpha-secretase inhibitor is significantly decrease in expression, alpha-secretase activity would be increased, which would result in the reduction of secreted Abeta species because of the mutual exclusivity of the alpha- versus beta-secretase cleavage of APP previously discussed. It is also possible that the reduction of *CD38* and *TIMP3* works synergistically to reduce extracellular Abeta by decreasing beta- and gamma-, and increasing alpha-secretase activity.

To confirm our results, experiments were repeated with cryogenically preserved cells, as well as freshly transfected cells (to ensure that the transcriptional changes observed are not due to locus-specific integration of the transposable vectors), and APP metabolites were measured using the Meso Scale Discovery (MSD) platform (Meso Scale Diagnostics LLC, Rockville, MD, USA) which allows for the simultaneous, single-well measurement of Abeta1-40 and Abeta1-42, or sAPPalpha and sAPPbeta. Again, *ABCC1*-overexpressing cells had a 36.96% (t=10.97, df=10, p=6.74e-07) and a 35.21% (t=7.84, df=10, p=1.40e-05) reduction in extracellular Abeta1-40, as well as a 39.66% (t=11.42, df=10, p=4.66e-07) and 35.75% (t=9.73, df=10, p=9.03e-03) reduction in extracellular Abeta1-42. Furthermore, the two experiments saw a 29.45% (t=6.64, df=10, p=5.81e-05) and a 23.55% reduction (t=3.64, df=10, p=4.56e-03) in extracellular sAPPbeta, with no significant effect on sAPPalpha levels in the first experiment, but with a 16.27% reduction (t=3.21, df=10, p=9.30e-03) in the second experiment. Because the MSD platform allows for the simultaneous measurement

of sAPPalpha and sAPPbeta in a single well, we used the ratio of sAPPalpha over sAPPbeta (sAPPalpha/sAPPbeta) to monitor alpha- versus beta-secretase cleavage of APP molecules because it controls for many of the confounding factors that could influence our measurements, and instead offers a mole-to-mole comparison. Indeed, in both experiments, ABCC1-overexpressing cells had a 35.20% ( $t=-10.89$ ,  $df=10$ ,  $p=7.24e-07$ ) and 9.41% increase ( $t=-2.71$ ,  $df=10$ ,  $p=0.022$ ) in sAPPalpha/sAPPbeta, implying a significant increase or reduction of alpha- or beta-secretase activity, respectively. Results are summarized in **Figure 3**.

Cells were again subject to RNA-seq. In both experiments, TIMP3 was significantly downregulated, with a log2FC of -0.64 in cryopreserved cells ( $N=6$ ,  $n=3$ ,  $p=0.015$ ) and -0.82 in newly transfected cells ( $N=6$ ,  $n=3$ ,  $p=5.7e-03$ ). CD38 had an insignificant log2FC of -0.53 in cryopreserved cells ( $N=6$ ,  $n=3$ ,  $p=0.24$ ) and -0.48 ( $N=6$ ,  $n=3$ ,  $p=0.069$ ) in the newly generated cell line; however, we do not believe that this is necessarily a reason to completely disregard the involvement of CD38 in the altered APP metabolism observed, as it is trending towards significance in the newly generated cell line. Furthermore, this confirms that the reduction in extracellular Abeta species is likely not due to integration of the transposable vectors within genes that alter APP processing, but rather that the increase in ABCC1 protein expression is likely altering transcription of genes whose products are capable of altering APP metabolism.

To determine if the transcriptional effects were cell line specific, we co-transfected the vectors (with SB100X) into ReNcell VM cells (MilliporeSigma), a human neural progenitor line, and extracted RNA from differentiated cells (14 days without growth factors). Transcripts were quantified using TaqMan (Applied Biosystems, Foster City, CA, USA) quantitative reverse transcriptase PCR (qRT-PCR), with targeted transcripts normalized *ACTB* expression, using the relative quantification (RQ) method (Livak and Schmittgen, 2001). *TIMP3* and *CD38* mean RQs were 11.10% lower ( $t=3.236$ ,  $df=22$ ,  $p=3.80e-03$ ) and 76.0% lower ( $t=-12.76$ ,  $df=22$ ,  $p=1.21e-11$ ), respectively, in the *ABCC1*-overexpressing cells versus the empty vector control (see **Figure 4**). These results agree with our previous results, that ABCC1 overexpression significantly alters the transcription levels of *TIMP3* and *CD38*, in a direction consistent with the reduced extracellular Abeta, and increased alpha- over beta-secretase cleaved APP molecules, and further demonstrates that altered transcriptional regulation of this gene is due to increased expression of ABCC1, rather than disruption of these genes due to transposable integration of the vectors.

Taken together, our work confirms what previous labs have reported – that Abeta is a substrate for ABCC1-mediated export – but also provides novel insight: that increased ABCC1 expression reduces extracellular Abeta levels, likely via the alteration of alpha-, beta-, and gamma-secretase activity due to transcriptional modification of *TIMP3* and *CD38*. How ABCC1 alters these transcripts is unknown, but we hypothesize it is due to increased export of ABCC1's canonical substrates, though further functional studies will be required to completely delineate the mechanism. Regardless, compounds that can dramatically increase ABCC1 transport activity or those that can increase ABCC1 expression, may prove to be viable drugs for the treatment or prevention of AD by not only increasing clearance of Abeta from the brain, but also by reducing the amount of Abeta that is produced. Many drugs have already been developed to block ABCC1 transport to prevent chemoresistance in cancer (Stefan and Wiese, 2019). Compounds identified in these drug development pipelines that have the opposite effect should be studied in the context of Alzheimer's disease.

## **Materials and Methods:**

### **Cell line generation:**

**BE(2)-m17:** Human APP and ABCC1 codon-optimized cDNA was cloned into the Sleeping Beauty transposable vectors pSBbi-Hyg and pSBbi-Pur, respectively (gifts of Eric Kowarz, Addgene plasmids #60524 and #60523) by GenScript (Piscataway, NJ, USA). pSBbi-Hyg-APP was cotransfected with the transposase-encoding vector pCMV(CAT)T7-SB100 (a gift of Zsuzsanna Izsvak, Addgene plasmid #34879) into BE(2)-m17 human neuroblastoma cells (ATCC, Manassas, VA, USA), using the Cell Line Nucleofector Kit V and the Amaxa Nucleofector II Device (Lonza Group AG, Basel, CH). Stable cells were selected for with 1mg/mL hygromycin B (Invitrogen, Carlsbad, CA, USA). This APP-overexpressing cell line (now referred to as BE(2)-m17-APP) was then used to create the two experimental cell lines to ensure that APP expression is not variable due to transfection conditions. To this end, pSBbi-Pur-ABCC1 or empty vector was cotransfected with SB100X into BE(2)-m17-APP, and stable cells selected for with 10ug/mL puromycin (Gibco, Thermo Fisher Scientific, Waltham, MA), and maintained with 2ug/mL puromycin and 200ug/mL hygromycin B.

**ReNcell VM:** pSBbi-Pur-ABCC1 or empty vector were cotransfected with SB100X using the same Amaxa Nucleofector II and kit V (Lonza Group AG). Stably expressing cells were selected for using 10ug/mL



puromycin (Gibco). When maintained with human epidermal growth factor (EGF) and fibroblast growth factor basic (bFGF) proteins (SigmaMillipore), ReNcell VM's remain as human neuronal precursor cells. Upon removal of the growth factors, the cells will terminally differentiate and begin to mature into neurons and astrocytes.

### **APP metabolite experiments and cellular extracts:**

Weekly,  $1.4 \times 10^7$  cells per line were plated in a well of a 6-well plate without antibiotics (hygromycin and puromycin) and with daily media changes. On the fourth day, supernatant was harvested and supplemented to a final concentration of 1.0mM of an irreversible serine protease inhibitor, AEBSF (Thermo Fisher Scientific), then clarified at 10,000g for 10minutes at room temperature. Resulting supernatant was transferred to a new tube and stored at -80 °C until analysis. Cells in the plate were lysed for either protein extraction using RIPA buffer (Thermo Fisher Scientific) or RNA extraction using the Quick-RNA miniprep kit (Zymo Research, Irvine, CA, USA), either of which were stored at -80 °C until analysis.

For the first two sets of APP metabolite experiments, after 3 weeks of samples have been stored, supernatants were diluted 4-fold and assayed with the Amyloid beta 40 Human ELISA Kit and either the Amyloid beta 42 Human ELISA Kit or the Amyloid beta 42 Human ELISA Kit Ultrasensitive (Invitrogen), according to the manufacturer's instructions. For the second two sets, supernatants were diluted 4-fold and assayed with the V-PLEX Plus Abeta Peptide Panel 1 (6E10) Kit and the sAPPalpha/sAPPbeta Kit (Meso Scale Discovery), according to the manufacturer's protocol.

### **Flow cytometry assay:**

Both cell lines were incubated with media supplemented with 200nM human Beta-Amyloid (1-42) HiLyte Fluor 555 (AnaSpec, Fremont, CA, USA), with or without thiethylperazine (MilliporeSigma) for approximately 18 hours. Cells were then washed twice with phosphate buffered saline (PBS), trypsinized, and spun-down. Pelleted cells were washed once with ice cold PBS, then resuspended in 1% FBS in ice cold PBS, and kept on ice until assayed. Sorting occurred on the FACSCanto II (BD Biosciences), and initially gated using untreated cells. Values are reported as the percentage of fluorescent cells.



## **RNA sequencing:**

The first RNA-seq experiment utilized the TruSeq RNA Library Prep Kit v2 on the NextSeq500 (Illumina), and results mapped to 37,703 unique Ensembl IDs. The mean total reads per sample was  $58.0 \pm 15.1$  million. The next two RNA-seq experiments utilized the SMARTer Stranded Total RNA-Seq Kit v2 – Pico Input Mammalian (Takara Bio Inc., Kusatsu, Shiga, JP), and were sequenced on the NovaSeq 6000 (Illumina). Results mapped to 54,723 and 55,109 unique Ensembl IDs, respectively. The mean total reads per sample was  $73.2 \pm 14.6$  and  $50.6 \pm 7.6$  million reads, respectively. FASTQs were generated with bcl2fastq v2.18 (Illumina). Reads were aligned with STAR v2.7.3a (Dobin and Gingeras, 2016) to generate BAM files, and differential expression analysis was accomplished using featureCounts from Subread package v2.0.0 (Liao, Smyth and Shi, 2014) and DeSeq2 v1.26.0 (Love, Huber and Anders, 2014).

## **qRT-PCR:**

Reverse transcription (RT) and no-RT reactions were achieved using SuperScript IV VILO Master Mix (Thermo Fisher Scientific), and qPCR was performed using TaqMan Fast Advanced Master Mix (Applied Biosystems) and multiplexed with primer/probe set for ACTB (Hs01060665\_g1, VIC-MGB) and either TIMP3 (Hs00165949\_m1, FAM-MGB) or CD38 (Hs00120071\_m1, FAM-MGB). Reactions were run on the QuantStudio 6 Flex Real-Time PCR System (Applied Biosciences), according to the manufacturer's protocol. Samples were measured in quadruplicate and quantified using the  $RQ = 2^{-(\Delta\Delta CT)}$  method (Livak and Schmittgen, 2001), and values reported as means of those technical replicates.

## FIGURES AND LEGENDS:

**Figure 1: ABCC1 overexpression in BE(2)-m17 cells significantly decreases extracellular Abeta1-40 and 1-42 levels.** [A] and [B] are experiment 1 and 2, respectively. The empty vector cell line is labeled “Puro” (grey boxes), and ABCC1-overexpressing cells are labeled “ABCC1” (blue boxes). Each point on the plots is the mean of technical quadruplicates, as measured by ELISA. P-values reported on each plot are calculated from Student’s two-sample t-test by comparing the two groups in that plot (N=6, n=3 for each plot).

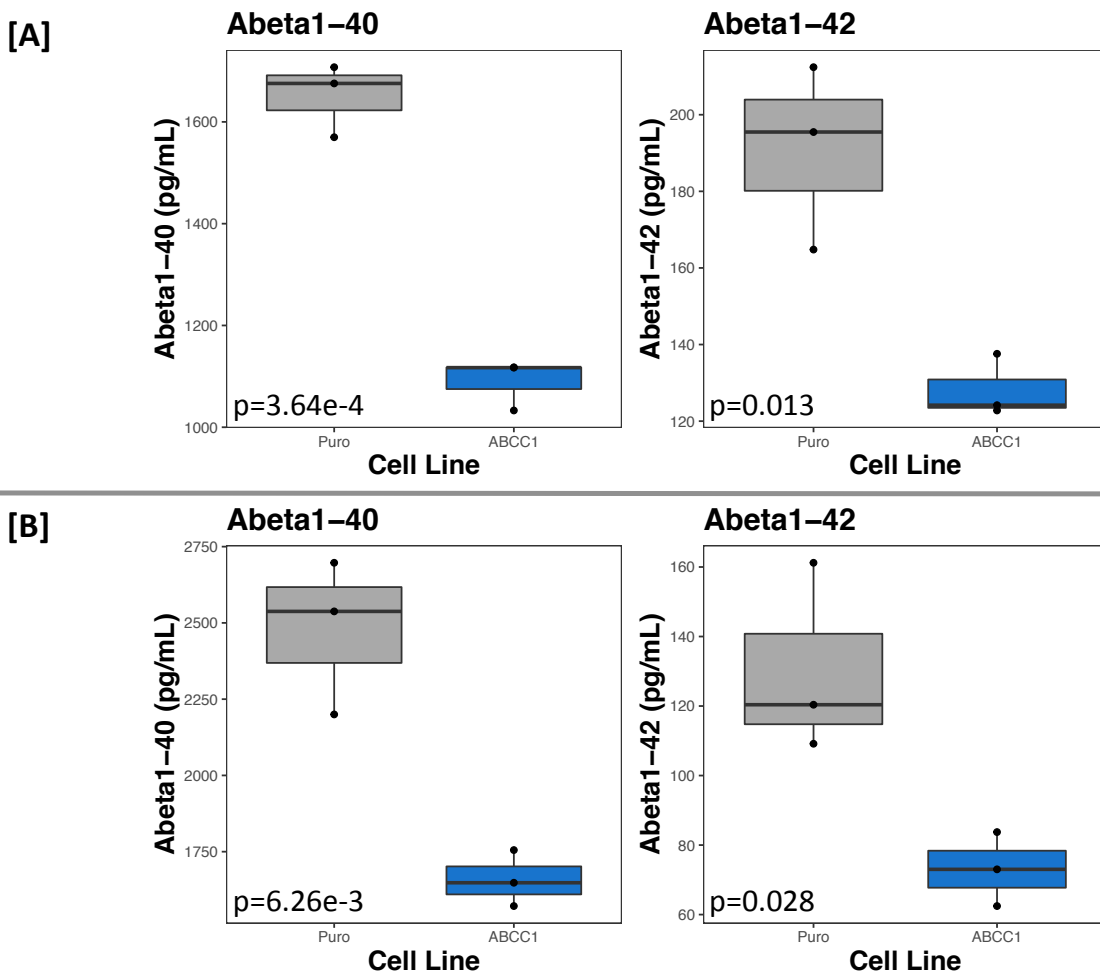

**Figure 2: ABCC1 exports Abeta, and that activity is increased by thiethylperazine.** [A] shows the original gating using untreated (unstained) cells to identify singlets and set a threshold for fluorescence. [B] shows the results of the cytometry experiment when empty vector cells (Puro, grey bars) or ABCC1 over-expressing cells (ABCC1, blue bars) are treated with fluorescent Abeta1-42 with or without thiethylperazine (TEP). Cells in quadrant 1 (Q1) are considered fluorescent, while those in Q4 are not. Percentage of fluorescent cells is plotted as a bar graph in [C].

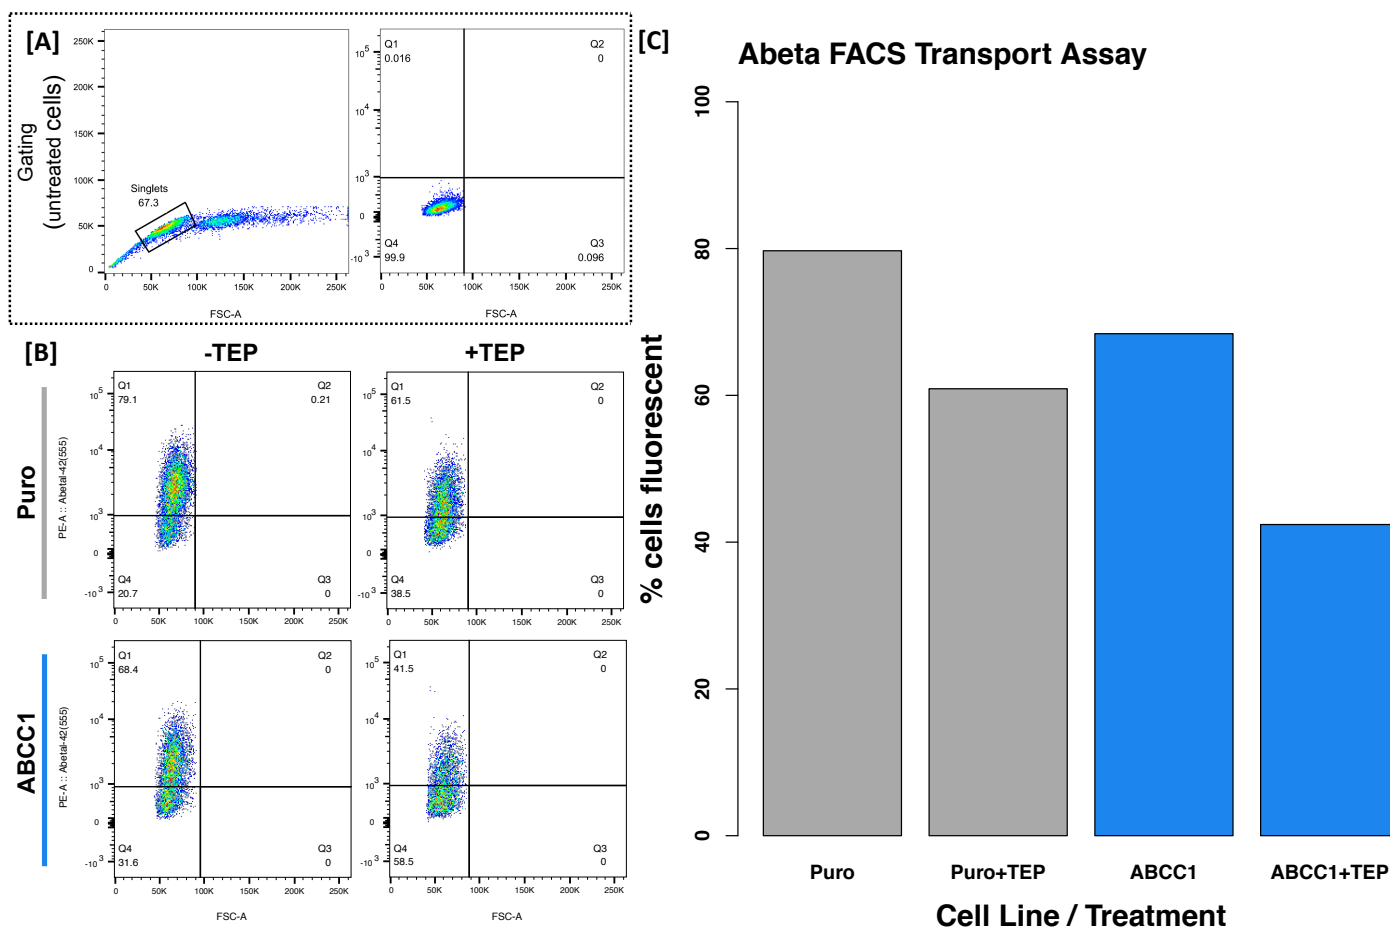

**Figure 3: ABCC1 overexpression in BE(2)-m17 cells significantly decreases extracellular Abeta1-40, Abeta1-42, and sAPPbeta levels, and increases the ratio of alpha- to beta-secretase cleaved APP molecules.** [A] and [B] show the third (cryopreserved cells) and fourth (newly transfected cells) APP metabolite experiments, respectively, measured using the MSD platform. The empty vector cell line is labeled “Puro” (grey boxes), and ABCC1-overexpressing cells are labeled “ABCC1” (blue boxes). All points on the plot are means of technical quadruplicates. P-values reported on each plot are calculated from Student’s two-sample t-test by comparing the two groups in that plot (N=12, n=6 for each plot). The results in [A] demonstrate that the decrease in extracellular Abeta species is not temporal, and [B] demonstrates that the location of integration of the transposable vectors is not the reason for altered APP metabolism.

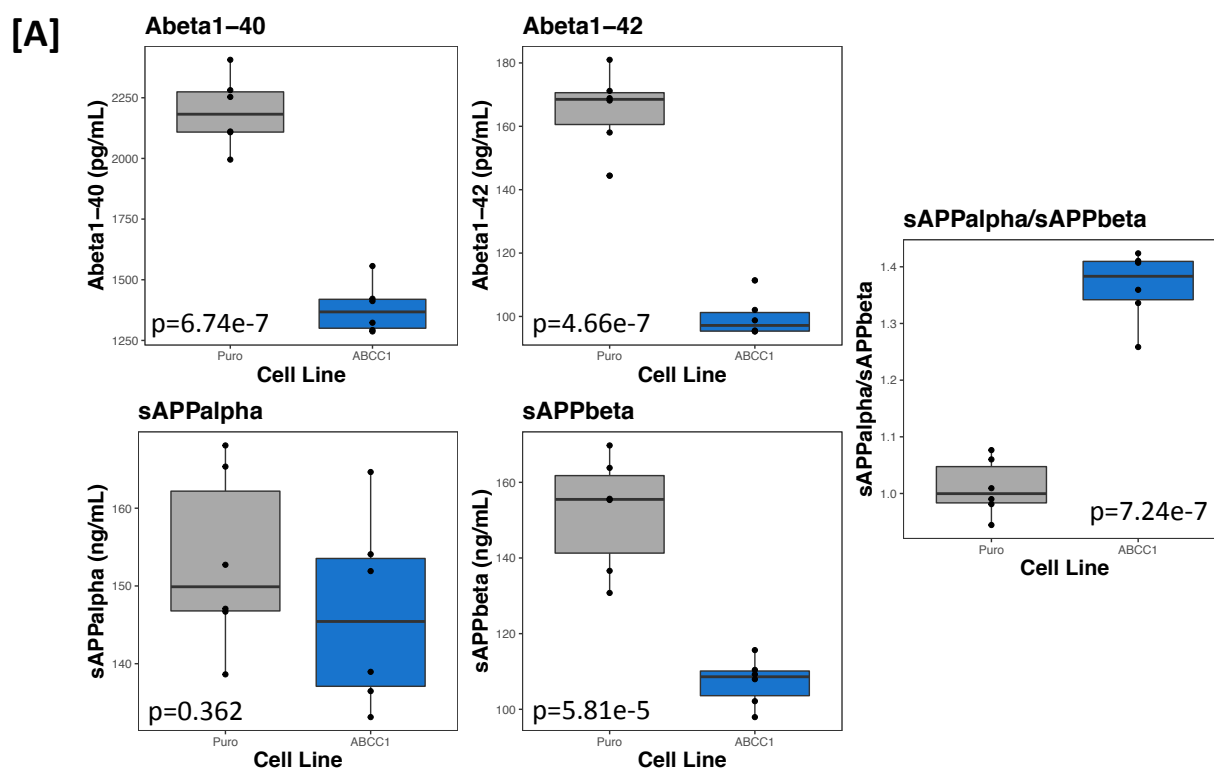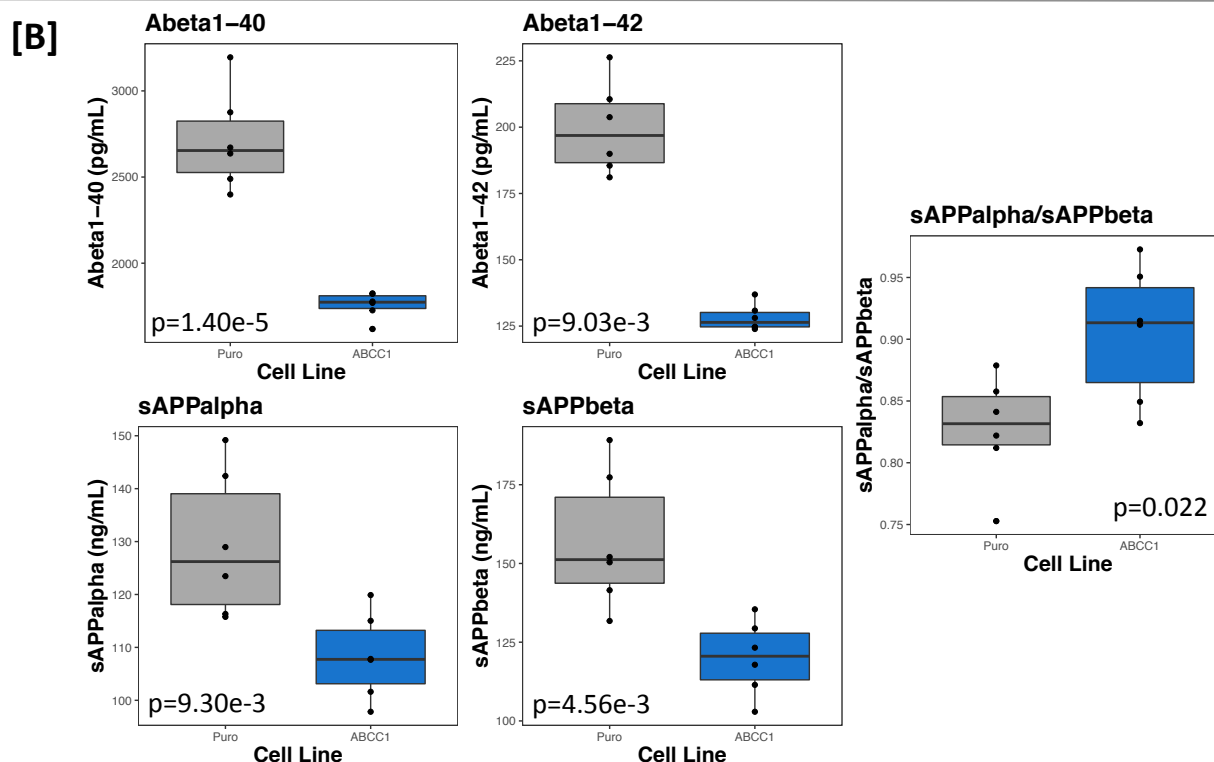

**Figure 4: ABCC1 overexpression in ReNcell VM, a human neural progenitor cell line, significantly decreases mRNA levels of *TIMP3* and *CD38*.** [A] and [B] show the relative quantification (RQ) of *TIMP3* and *CD38* mRNA in ReNcell VM. The empty vector cell line is labeled “Puro” (grey boxes), and ABCC1-overexpressing cells are labeled “ABCC1” (blue boxes). All points on the plots are means of technical quadruplicates. P-values reported on each plot are calculated from Student’s two-sample t-test by comparing the two groups in that plot (N=24, n=12 for each plot). The results confirm that altered expression of these genes is not due to location-specific genomic integration of the vectors, but rather because of increased ABCC1 expression. Furthermore, this demonstrates that decreased expression of these genes due to ABCC1 overexpression is not specific to the BE(2)-m17 human neuroblastoma cell line.

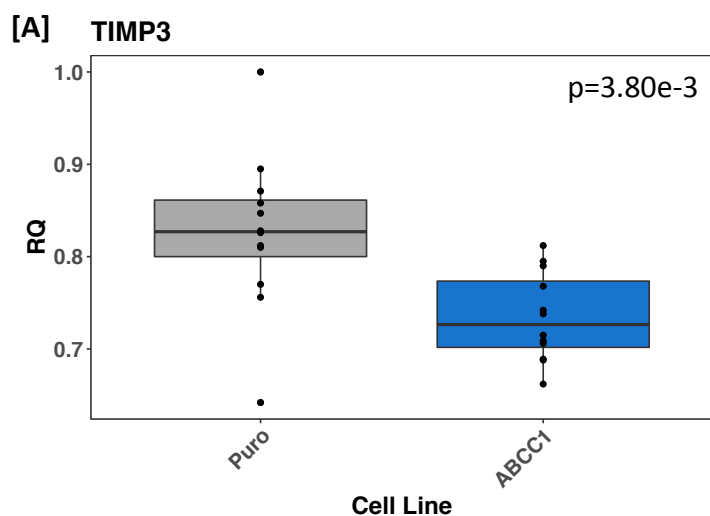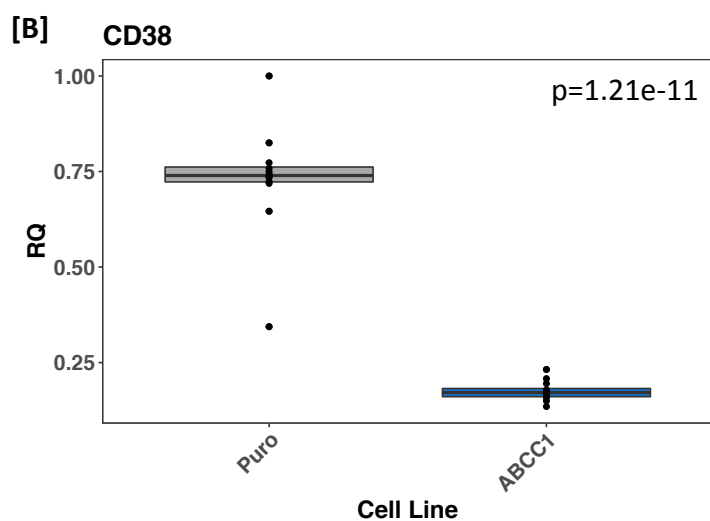

**Supplementary Table 1: *TIMP3* and *CD38* are the only two differentially expressed genes with log<sub>2</sub>FCs that can account for the altered APP processing observed, according to current literature.** Of the 55 GOIs identified, 12 are linked to altered APP processing or metabolism, but 10 of those genes have expression level changes in the opposite direction than are known in the literature to be able to account for the altered extracellular levels of APP-derived peptides observed. This may represent a lack of knowledge about these genes' complete functions in APP metabolism, or it may indicate that their known roles have rather subtle effects. GOIs with expression levels consistent with our observations are highlighted in blue, while those that are directly inconsistent are highlighted in red.

| Gene Name      | Ensembl Gene ID | Chr. | Log2FC     | Stat       | p-value     | p-adjusted  | Justification                                                                                                                                                                                                                                                                                                                                                                                                                                                                                                                                                                                           | Final GOI? |
|----------------|-----------------|------|------------|------------|-------------|-------------|---------------------------------------------------------------------------------------------------------------------------------------------------------------------------------------------------------------------------------------------------------------------------------------------------------------------------------------------------------------------------------------------------------------------------------------------------------------------------------------------------------------------------------------------------------------------------------------------------------|------------|
| <b>GHRH</b>    | ENSG00000118702 | 20   | 8.00958478 | 6.5363983  | 6.30E-11    | 2.16E-09    | A GHRH antagonist, MIA-690, reduced Abeta1-42 and Tau deposition in 5xFAD mouse brains (Jaszberenyi et al., 2012); therefore, if GHRH were responsible for the reduced extracellular Abeta observed in our experiment, we would expect to see it down-, rather than up-regulated.                                                                                                                                                                                                                                                                                                                       | No         |
| <b>GC</b>      | ENSG00000145321 | 4    | 6.02179664 | 4.38997943 | 1.13E-05    | 0.000140051 | GC, aka DBP, can bind to Abeta to reduce oligomerization (Moon et al., 2013). Therefore, it may be possible, though unlikely, that increased GC is binding to Abeta and making it unrecognizable by antibodies used in assays. However, GC upregulation is not significant in the second RNA-seq experiment, and is downregulated in the third experiment. Therefore, we do not believe that the differential expression of GC can account for reduced Abeta.                                                                                                                                           | No         |
| <b>CYP1A2</b>  | ENSG00000140505 | 15   | 5.43876407 | 4.12430361 | 3.72E-05    | 0.000403413 | Only publication linking the two terms refers to the enzymatic profile of a drug that blocks Abeta-induced apoptosis (Elkambhaw et al., 2017). There is no known direct link to APP or Abeta metabolism.                                                                                                                                                                                                                                                                                                                                                                                                | No         |
| <b>PLXNA4</b>  | ENSG00000221866 | 7    | 2.2827125  | 17.6165379 | 1.84E-69    | 1.31E-66    | Transfection of 3 isoforms of PLXNA4 did not alter APP processing, but the full-length isoform increased TAU phosphorylation (Jun et al., 2014). Literature does not demonstrate a direct connection between PLXNA4 expression and APP/Abeta metabolism.                                                                                                                                                                                                                                                                                                                                                | No         |
| <b>PTGS1</b>   | ENSG00000095303 | 9    | 1.96085251 | 4.05140616 | 5.09E-05    | 0.000536458 | Expression of COX1, encoded by PTGS1, in CHO cells, resulted in increased Abeta1-42 (Qin et al., 2003); therefore, if PTGS1 expression were responsible for the decrease in extracellular Abeta observed, we would expect to see PTGS1 down-, rather than up-regulated.                                                                                                                                                                                                                                                                                                                                 | No         |
| <b>HCN1</b>    | ENSG00000164588 | 5    | 1.71441095 | 5.05079538 | 4.40E-07    | 7.73E-06    | Link to Abeta processing has to do with neuroexcitability, but authors also found that overexpression of HCN1 in Neuro2a cells decreased Abeta production (Chang et al., 2019). However, HCN1 was not significantly upregulated in the second experiment, and was downregulated in the third experiment. Expression of HCN1 cannot account for reduced Abeta in all experiments.                                                                                                                                                                                                                        | No         |
| <b>FOXO1</b>   | ENSG00000054598 | 6    | 1.67804982 | 9.68683622 | 3.43E-22    | 3.32E-20    | Transcription factor found to be differentially expressed in AD (Rahman et al., 2020), not a catalytic enzyme. Furthermore, FOXO1 was significantly downregulated in the second experiment and insignificantly upregulated in the third experiment. Expression is not consistent to even account for changes in APP metabolizing enzymes.                                                                                                                                                                                                                                                               | No         |
| <b>TGFB3</b>   | ENSG00000119699 | 14   | 1.63851504 | 9.48843155 | 2.35E-21    | 2.11E-19    | Oligomeric Abeta can induce TGFB3 production (Tapella et al., 2018), though the gene product is not linked to APP/Abeta metabolism. Furthermore, TGFB3 was significantly downregulated in the second experiment, and insignificantly upregulated in the third experiment. TGFB3 cannot logically account for altered APP processing observed.                                                                                                                                                                                                                                                           | No         |
| <b>SORCS2</b>  | ENSG00000184985 | 4    | -1.5340787 | -9.9562092 | 2.37E-23    | 2.52E-21    | Increased SORCS2 decreased APP processing, and decreased SORCS2 increased gamma-secretase activity (Reitz et al., 2013). SORCS2 was significantly downregulated in all 3 RNA-seq experiments, which is the opposite of what we would expect if SORCS2 expression levels accounted for altered APP processing observed.                                                                                                                                                                                                                                                                                  | No         |
| <b>SEZ6</b>    | ENSG00000063015 | 17   | -1.5364914 | -14.958268 | 1.38E-50    | 5.39E-48    | SEZ6 is a substrate for BACE1/2 (Pigoni et al., 2016). SEZ6 overexpression results in reduced Abeta species (Paracchini et al., 2018). SEZ6 expression was significantly downregulated in all 3 RNA-seq experiments, and thus its expression is in the opposite direction expected to account for reduced extracellular Abeta species.                                                                                                                                                                                                                                                                  | No         |
| <b>NKY6-1</b>  | ENSG00000163623 | 4    | -1.5453016 | -4.6731491 | 2.97E-06    | 4.25E-05    | Association with amyloid islet amyloid pancreatic polypeptide.                                                                                                                                                                                                                                                                                                                                                                                                                                                                                                                                          | No         |
| <b>NOX5</b>    | ENSG00000255346 | 15   | -1.5880465 | -15.399964 | 1.64E-53    | 7.00E-51    | Plays a role in oxidative stress in Alzheimer's disease (Tarafdar and Pula, 2018). No direct link to APP/Abeta metabolism.                                                                                                                                                                                                                                                                                                                                                                                                                                                                              | No         |
| <b>PTGER4</b>  | ENSG00000171522 | 5    | -1.6250699 | -4.0742588 | 4.62E-05    | 0.000491256 | PTGER4 stimulation can result in PSEN1 endocytosis, and activation of the gamma-secretase (Hoshino et al., 2009), thus a decrease in PTGER4, as we observed, may result in reduced gamma-secretase activity. However, PTGER4 downregulation in the second and third RNA-seq experiments was statistically insignificant and carried very minimal log2FC of -0.189 and -0.021, respectively. Therefore, differential expression of PTGER4 does not likely account for decreased extracellular Abeta species seen in all experiments.                                                                     | No         |
| <b>MAFA</b>    | ENSG00000182759 | 8    | -1.6918124 | -4.564746  | 5.00E-06    | 6.81E-05    | Association with amyloid islet amyloid pancreatic polypeptide.                                                                                                                                                                                                                                                                                                                                                                                                                                                                                                                                          | No         |
| <b>SEMA3A</b>  | ENSG00000075213 | 7    | -1.6940126 | -18.902189 | 1.09E-79    | 1.12E-76    | sAPPalpha can bind SEMA3A and inhibit it (Magdesian et al., 2011), and SEMA3A may induce neuronal collapse in mice (Good et al., 2004), but SEMA3A stimulation has been shown to increase Tau phosphorylation with no observed differences in APP processing (Jun et al., 2014). SEMA3A is significantly downregulated in all 3 RNA-seq experiments; however, we cannot find a link between SEMA3A and APP metabolism in the literature.                                                                                                                                                                | No         |
| <b>FAS</b>     | ENSG00000026103 | 10   | -1.775488  | -8.4014521 | 4.41E-17    | 2.92E-15    | FAS is implicated in AD because of apoptosis (Ethell and Buhler, 2003). No direct link in literature between FAS and altered APP processing. FAS downregulation in the second and third RNA-seq experiments was insignificant.                                                                                                                                                                                                                                                                                                                                                                          | No         |
| <b>SSTR1</b>   | ENSG00000139874 | 14   | -1.7856036 | -11.357719 | 6.79E-30    | 1.11E-27    | SST (somatostatin) has been shown to bind to Abeta (Lau et al., 2017), and is the reason for the link between SSTR1 and Abeta; however, SSTR1 is a G-protein coupled receptor, with no known APP processing abilities, and its downregulation in the second and third RNA-seq experiments was insignificant. There is no reason to believe SSTR1 can be directly responsible for lowering extracellular Abeta.                                                                                                                                                                                          | No         |
| <b>CYP19A1</b> | ENSG00000137869 | 15   | -1.8706075 | -14.752983 | 2.94E-49    | 1.10E-46    | A SNP in CYP19A1 is associated with AD (Huang and Poduslo, 2006), but it has been shown that the SNP identified is not associated with altered APP processing (Han, Schellenberg and Wang, 2010). No direct link between CYP19A1 and APP metabolism found.                                                                                                                                                                                                                                                                                                                                              | No         |
| <b>NAV3</b>    | ENSG00000067798 | 12   | -1.9473467 | -5.548492  | 2.88E-08    | 6.35E-07    | Regulates axon guidance and has been shown to be downregulated in young APPswe/PS1deltaE9 mice (Zong et al., 2015). No direct link between APP processing, and downregulation was statistically insignificant in second and third RNA-seq experiments.                                                                                                                                                                                                                                                                                                                                                  | No         |
| <b>TIMP3</b>   | ENSG00000100234 | 22   | -1.9539687 | -22.301951 | 3.5374E-110 | 7.5565E-107 | TIMP3 encodes the Tissue Inhibitor of Metalloproteinases 3, a protein that can irreversibly inhibit APP-cleaving alpha-secretases like ADAM10 and ADAM17 (Hoe et al., 2007). TIMP3 expression has also been shown to be reduced in AD brain tissue (Dunckley et al., 2006), which may play a role in increased cerebral Abeta. Logically, if TIMP3 expression is downregulated, more APP molecules are more likely to be cleaved by an alpha-secretase. This would result in decreased extracellular Abeta and an increase in alpha- versus beta-secretase cleavage of APP.                             | YES        |
| <b>WNT4</b>    | ENSG00000162552 | 1    | -1.9799445 | -14.536432 | 7.12E-48    | 2.43E-45    | No link to APP/Abeta metabolism.                                                                                                                                                                                                                                                                                                                                                                                                                                                                                                                                                                        | No         |
| <b>NEUROD1</b> | ENSG00000162992 | 2    | -2.0840307 | -7.3142458 | 2.59E-13    | 1.18E-11    | Related to Alzheimer's disease because of its role in neurogenesis and differentiation (Dard, Dahan and Rampon, 2019), but linked to amyloid because of islet amyloid pancreatic polypeptide, as the gene is strongly associated with diabetes.                                                                                                                                                                                                                                                                                                                                                         | No         |
| <b>SNCAIP</b>  | ENSG00000064692 | 5    | -2.2299991 | -7.2718384 | 3.55E-13    | 1.58E-11    | siRNA targeting SNCAIP reduced aggresome activity, and the aggresome is capable of storing and degrading aggregated proteins (Zaarur et al., 2015). No literature shows a direct link between SNCAIP and APP processing.                                                                                                                                                                                                                                                                                                                                                                                | No         |
| <b>PLCG2</b>   | ENSG00000197943 | 16   | -2.320263  | -8.5616116 | 1.11E-17    | 7.67E-16    | One study found PLCG2 is significantly upregulated when cells exposed to Abeta (Sierksma et al., 2020), and another found that a variant in PLCG2 protects against Tau phosphorylation, and expression seems to be responsive to Abeta (Kleineidam et al., 2020). No study has demonstrated that altered PLCG2 expression alters APP processing. Furthermore, downregulation of PLCG2 was not significant in the second or third experiments.                                                                                                                                                           | No         |
| <b>ACE2</b>    | ENSG00000130234 | X    | -2.3287002 | -4.3401745 | 1.42E-05    | 0.000171912 | ACE2 activation reduces hippocampal soluble Abeta1-42 (Evans et al., 2020), which is in opposition to our results. However, ACE2 can convert Abeta1-43 to Abeta1-42, which can then be converted to Abeta1-40 by ACE (Liu et al., 2014). If, in our system, less Abeta1-43 is being converted to Abeta1-42, and is thus not detectable by our assay, downregulation of ACE2 may account for some of the reduction in extracellular Abeta observed. However, the downregulation of ACE2 was insignificant in the second RNA-seq experiment, and was insignificantly upregulated in the third experiment. | No         |
| <b>FGFR3</b>   | ENSG00000068078 | 4    | -2.3335884 | -10.261628 | 1.05E-24    | 1.20E-22    | FGFR3 is released by neurons stimulated by oligomeric Abeta1-42 to recruit microglia to damaged tissue (Noda et al., 2014). No literature linking FGFR3 to APP/Abeta metabolism.                                                                                                                                                                                                                                                                                                                                                                                                                        | No         |
| <b>MBP</b>     | ENSG00000197971 | 18   | -2.3392196 | -3.9941838 | 6.49E-05    | 0.000662943 | It has been shown that MBP can act as a chaperone protein for Abeta, limiting its fibrillation (Hoos et al., 2007), and that MBP has serine proteinase activity that can degrade Abeta (Liao et al., 2009). Therefore, if MBP could account for reduced extracellular Abeta, we would expect to see it up-, not down-regulated, in the ABC11-overexpressing cells.                                                                                                                                                                                                                                      | No         |
| <b>ABI3</b>    | ENSG00000108798 | 17   | -2.5271572 | -4.8113809 | 1.50E-06    | 2.31E-05    | Clusters of ABI3+ microglia are associated with amyloid plaques, which may suggest a role for ABI3+ in microglia motility (Satoh et al., 2017), and ABI3(S209F) has been found to be a risk factor for AD (Sims et al., 2017), but no literature links ABI3 directly to APP processing or metabolism.                                                                                                                                                                                                                                                                                                   | No         |
| <b>GRIK1</b>   | ENSG00000171189 | 21   | -2.6364395 | -4.9042159 | 9.38E-07    | 1.52E-05    | Stimulation of GRIK1 with kainic acid increased Abeta and oligomeric Abeta, likely because GRIK1 signaling increases phosphorylation and activation of NF-kappa B (Ruan et al., 2019), a transcription factor. Therefore, if the downregulation of GRIK1 observed in our experiment played a role in reducing extracellular Abeta, we would expect that the lack of GRIK1 signalling through NF-kappa B alters transcription of genes capable of altering APP metabolism, rather than GRIK1 directly playing a role.                                                                                    | No         |
| <b>ERBB4</b>   | ENSG00000178568 | 2    | -2.6467963 | -16.468033 | 6.23E-61    | 3.66E-58    | ERBB4 is the neuroregulin (NRG1) receptor, and is cleaved by factor-alpha converting enzyme, then subsequently by PSEN-dependent gamma-secretase (Woo et al., 2012), the same gamma-secretase that cleaves the APP molecule. However, no literature directly links ERBB4 to altered APP/Abeta metabolism.                                                                                                                                                                                                                                                                                               | No         |



|                 |                 |    |            |            |             |             |                                                                                                                                                                                                                                                                                                                                                                                                                                                                                                                                                                                                                                                                                                                                                                                                                                                                                                                                                                                                                                                                                         |     |
|-----------------|-----------------|----|------------|------------|-------------|-------------|-----------------------------------------------------------------------------------------------------------------------------------------------------------------------------------------------------------------------------------------------------------------------------------------------------------------------------------------------------------------------------------------------------------------------------------------------------------------------------------------------------------------------------------------------------------------------------------------------------------------------------------------------------------------------------------------------------------------------------------------------------------------------------------------------------------------------------------------------------------------------------------------------------------------------------------------------------------------------------------------------------------------------------------------------------------------------------------------|-----|
| <b>CD38</b>     | ENSG0000004468  | 4  | -2.9798536 | -5.78603   | 7.20694E-09 | 1.78449E-07 | CD38 encodes the Cluster of Differentiation 38, an enzyme that synthesizes and hydrolyzes cyclic adenosine 5'-diphosphate-ribose, a molecule that regulates intracellular calcium signaling (Chini et al., 2002). It has been shown that CD38 knockout AD mouse models have improved cognitive deficits, decreased cerebral amyloid burden, and that primary neurons cultured from those mice secrete significantly less Abeta species (Blacher et al., 2015). The authors found that knockout of CD38 alters beta- and gamma-secretase activity, effectively reducing both (Blacher et al., 2015). Therefore, downregulation of CD38 resulting in decreased extracellular Abeta is consistent with the literature.                                                                                                                                                                                                                                                                                                                                                                     | YES |
| <b>KCNIP4</b>   | ENSG00000185774 | 4  | -2.9838801 | -27.415115 | 1.81E-165   | 8.51E-162   | The longest isoform of KCNIP4 can interact with PSEN1 of the gamma-secretase, and decreasing expression of this longest isoform increases Abeta1-40 and Abeta1-42 production (Massone et al., 2011). In another study, KCNIP4, aka CALP, overexpression did not alter gamma-cleavage of APP (Morohashi et al., 2002). Taken together, a decrease in KCNIP4 long isoform expression would increase extracellular Abeta, and a decrease in the short isoform should have no effect on APP processing. We see KCNIP4 expression decrease while extracellular Abeta species decrease. This is the opposite of what would be expected based on the literature.                                                                                                                                                                                                                                                                                                                                                                                                                               | No  |
| <b>SORCS3</b>   | ENSG00000156395 | 10 | -3.2424713 | -5.4616931 | 4.72E-08    | 1.00E-06    | Expression reduced in frontal cortex after amyloid deposition in APP/PS1 mice (Hermeijer et al., 2019), and knockdown of SORCS3 increased APP processing (Reitz et al., 2013). Therefore, if SORCS3 could account for reduced extracellular Abeta, we would expect to see it up-, rather than down-regulated.                                                                                                                                                                                                                                                                                                                                                                                                                                                                                                                                                                                                                                                                                                                                                                           | No  |
| <b>MUSK</b>     | ENSG00000030304 | 9  | -3.373102  | -4.5068209 | 6.58E-06    | 8.67E-05    | Link between MUSK and APP is that they are LRP4 coreceptors at the neuromuscular junction (Choi et al., 2013), with no known link to APP processing.                                                                                                                                                                                                                                                                                                                                                                                                                                                                                                                                                                                                                                                                                                                                                                                                                                                                                                                                    | No  |
| <b>TNFRSF1B</b> | ENSG00000028137 | 1  | -3.6063976 | -4.4895388 | 7.14E-06    | 9.34E-05    | A single study found that stimulation of their TNFRSF1B-APP-GFP chimeric receptor increased APP processing (Sim and Heese, 2010). The downregulation of TNFRSF1B is statistically insignificant in the second and third RNA-seq experiments. Downregulation of this receptor (with no known enzymatic function) cannot not directly account for altered APP processing.                                                                                                                                                                                                                                                                                                                                                                                                                                                                                                                                                                                                                                                                                                                 | No  |
| <b>CTNNA3</b>   | ENSG00000183230 | 10 | -3.8116282 | -14.065955 | 6.15E-45    | 1.78E-42    | One study found SNPs in CTNNA3 were associated with increased cerebral Abeta levels (Ertekin-Taner et al., 2003), but two other studies found that the association is not significant (Blomqvist et al., 2004; Busby et al., 2004), and a fourth found the association only in females (Miyashita et al., 2007). However, no direct link between CTNNA3, a cell-to-cell adhesion molecule, and APP/Abeta metabolism has been found in the literature. Interestingly, knockdown of a gene nested within the CTNNA3 locus, LRRTM3, has been shown to decrease secreted Abeta species through its interaction with APP and BACE1 (Lincoln et al., 2013). That study found a relationship between mRNA levels of CTNNA3, LRRTM3, BACE1, and APP, but did not demonstrate that CTNNA3 alters APP metabolism. Furthermore, in the same study, when LRRTM3 is knocked down in SH-SY5Y cells, CTNNA3 mRNA levels increased (Lincoln et al., 2013); therefore, it seems that an increase in CTNNA3 would be associated with decreased secreted Abeta species, if any relationship exists at all. | No  |
| <b>C4BPB</b>    | ENSG00000123843 | 1  | -4.1219575 | -8.0779878 | 6.58E-16    | 3.93E-14    | Link between C4BPB and amyloid is that C4BPB, amyloid A, and protein z serum levels may serve as biomarkers for pulmonary tuberculosis (Jiang et al., 2017).                                                                                                                                                                                                                                                                                                                                                                                                                                                                                                                                                                                                                                                                                                                                                                                                                                                                                                                            | No  |
| <b>CCK</b>      | ENSG00000187094 | 3  | -4.3958699 | -5.4313899 | 5.59E-08    | 1.17E-06    | One study found that CCK expression does not correlate with Abeta1-42 in AD patients (Plagman et al., 2019), and most studies linking CCK to amyloid pertain to islet amyloid pancreatic polypeptide.                                                                                                                                                                                                                                                                                                                                                                                                                                                                                                                                                                                                                                                                                                                                                                                                                                                                                   | No  |
| <b>DCC</b>      | ENSG00000187323 | 18 | -4.7379038 | -7.2792154 | 3.36E-13    | 1.51E-11    | APP interacts with DCC and enhances Nestin signalling (Rama et al., 2012), and PSEN1 processes DCC to ensure fidelity of axon guidance (Bai et al., 2011), but no link between DCC and APP processing was found. Downregulation of DCC was statistically insignificant in second and third RNA-seq experiments.                                                                                                                                                                                                                                                                                                                                                                                                                                                                                                                                                                                                                                                                                                                                                                         | No  |
| <b>CD34</b>     | ENSG00000174059 | 1  | -4.882655  | -16.260743 | 1.87E-59    | 9.79E-57    | Decreased counts of circulating CD34+ cells correlates with Abeta1-42 levels in AD patients (Maler et al., 2006), but no link between CD34 and APP/Abeta processing.                                                                                                                                                                                                                                                                                                                                                                                                                                                                                                                                                                                                                                                                                                                                                                                                                                                                                                                    | No  |
| <b>GLI3</b>     | ENSG00000106571 | 7  | -4.8874424 | -8.4404417 | 3.16E-17    | 2.10E-15    | GLI3 is a transcription factor that can repress Pitrm1 (Town et al., 2009), a metalloprotease capable of degrading Abeta when it accumulates in mitochondria (Falkevall et al., 2006). If GLI3 suppression were increasing PITRM1 expression, resulting in decreased Abeta species, PITRM1 would be on this list. There is no reason to believe that suppression of the transcription factor, itself, would decrease extracellular Abeta.                                                                                                                                                                                                                                                                                                                                                                                                                                                                                                                                                                                                                                               | No  |
| <b>HLA-DRB1</b> | ENSG00000196126 | 6  | -4.9849761 | -11.456865 | 2.17E-30    | 3.59E-28    | HLA-DRB1 is part of the major histocompatibility complex, and specific isoforms have shown high immunoreactivity to Abeta species (Zota et al., 2009). A link between HLA-DR1 and amyloid, then, makes sense <i>in vivo</i> , not in a monoculture of neuroblastoma cells. Furthermore, if Abeta were binding to HLA-DRB1, thus removing it from the supernatant, and that was the reason for measuring reduced extracellular Abeta, we would expect HLA-DRB1 expression to be up-, rather than down-regulated.                                                                                                                                                                                                                                                                                                                                                                                                                                                                                                                                                                         | No  |
| <b>BMP6</b>     | ENSG00000153162 | 6  | -5.4269376 | -4.0259947 | 5.67E-05    | 0.000590154 | It has been shown that Abeta increases BMP6 levels, <i>in vitro</i> (Crews et al., 2010), and BMP6 is neuroprotective against toxic effects of Abeta25-35 (Sun et al., 2014), but no link found between BMP6 and APP processing.                                                                                                                                                                                                                                                                                                                                                                                                                                                                                                                                                                                                                                                                                                                                                                                                                                                        | No  |
| <b>PLA2G4A</b>  | ENSG00000116711 | 1  | -5.6292257 | -5.0104561 | 5.43E-07    | 9.30E-06    | PLA2G4A has been shown to contribute to Abeta-induced lysosomal membrane permeabilization (Sarkar et al., 2020), and cytosolic phospholipase A2 activation facilitates oligomeric Abeta endocytosis by microglia (Teng et al., 2019). If PLA2G4A expression were to account for the reduced extracellular Abeta level observed, we would expect to see it up-, rather than down-regulated.                                                                                                                                                                                                                                                                                                                                                                                                                                                                                                                                                                                                                                                                                              | No  |
| <b>TNFSF10</b>  | ENSG00000121858 | 3  | -6.0304536 | -4.0878419 | 4.35E-05    | 0.000465899 | Administration of antibodies that neutralize TNFSF10 reduces Abeta1-42 in the hippocampi of 3xTg AD mice (Cantarella et al., 2015); however, TNFSF10 is a cytokine, not an enzyme. Therefore, we would expect that downregulation of this gene would not directly account for altered APP processing, but reduced signalling by TNFSF10 may alter levels of other genes capable of altering APP processing.                                                                                                                                                                                                                                                                                                                                                                                                                                                                                                                                                                                                                                                                             | No  |
| <b>OTX2</b>     | ENSG00000165588 | 14 | -6.0337592 | -4.1299129 | 3.63E-05    | 0.000394606 | OTX2 is a transcription factor involved in the maturation of perineuronal nets (Soleman et al., 2013). Reduced OTX2 may reduce expression of genes that can alter APP processing, but the transcription factor, itself, would not logically perform this task.                                                                                                                                                                                                                                                                                                                                                                                                                                                                                                                                                                                                                                                                                                                                                                                                                          | No  |
| <b>APLN</b>     | ENSG00000171388 | X  | -6.2095007 | -19.586904 | 2.00E-85    | 2.47E-82    | Administration of exogenous apelin-13, a peptide fragment resulting from cleavage of the APLN gene product, reduced Abeta production by decreasing BACE1 (beta-secretase) activity and increasing neprilysin (an Abeta degrading enzyme) activity (Luo et al., 2019). Therefore, if APLN expression could account for reduced extracellular Abeta observed in our experiment, we would expect APLN expression to be up-, rather than down-regulated.                                                                                                                                                                                                                                                                                                                                                                                                                                                                                                                                                                                                                                    | No  |
| <b>HDC</b>      | ENSG00000140287 | 15 | -6.5182389 | -6.0764451 | 1.23E-09    | 3.40E-08    | Converts histidine to histamine (Hocker et al., 1996). May be part of the signalling that results in differential expression of genes capable of altering APP metabolism, but a change in expression in either direction should not directly result in altered APP processing.                                                                                                                                                                                                                                                                                                                                                                                                                                                                                                                                                                                                                                                                                                                                                                                                          | No  |
| <b>CFI</b>      | ENSG00000205403 | 4  | -6.6038489 | -4.8502187 | 1.23E-06    | 1.94E-05    | CFI activity can be decreased by Abeta, which can activate the complement cascade (Lashkari et al., 2018), but no link found between CFI and APP/Abeta processing.                                                                                                                                                                                                                                                                                                                                                                                                                                                                                                                                                                                                                                                                                                                                                                                                                                                                                                                      | No  |
| <b>HNF1B</b>    | ENSG00000108753 | 17 | -6.9354737 | -5.5473661 | 2.90E-08    | 6.38E-07    | Transcription factor that controls expression of many genes implicated in glucose-induced insulin resistance (Wang et al., 2002). Again, a transcription factor, itself, should not logically have a direct role in altering APP processing unless altering the expression levels of genes capable of this task.                                                                                                                                                                                                                                                                                                                                                                                                                                                                                                                                                                                                                                                                                                                                                                        | No  |
| <b>INPP5D</b>   | ENSG00000168918 | 2  | -6.9920428 | -5.6192849 | 1.92E-08    | 4.38E-07    | INPP5D is believed to be involved in the immune response in the brain, regulating clearance of misfolded proteins by microglia (Efthymiou and Goate, 2017). If INPP5D had this function in our neuroblastoma monoculture, we would expect INPP5D to be up-, rather than down-regulated, if its expression accounted for the reduced extracellular Abeta observed.                                                                                                                                                                                                                                                                                                                                                                                                                                                                                                                                                                                                                                                                                                                       | No  |
| <b>CD3D</b>     | ENSG00000167286 | 11 | -7.0480262 | -5.2660668 | 1.39E-07    | 2.71E-06    | Only article linking CD3D to amyloid discusses reduction of CD3D positive T-lymphocytes in sRAGE-MSC treated rats (Oh et al., 2018). CD3D is part of the T-cell receptor with no known link between CD3D and APP processing.                                                                                                                                                                                                                                                                                                                                                                                                                                                                                                                                                                                                                                                                                                                                                                                                                                                            | No  |
| <b>KCNMB2</b>   | ENSG00000197584 | 3  | -7.1102768 | -18.687604 | 6.25E-78    | 6.11E-75    | KCNMB2 locus was associated with hippocampal sclerosis in a GWAS (Beecham et al., 2014), but no direct link in the literature between KCNMB2 and APP/Abeta metabolism.                                                                                                                                                                                                                                                                                                                                                                                                                                                                                                                                                                                                                                                                                                                                                                                                                                                                                                                  | No  |
| <b>DPP4</b>     | ENSG00000197635 | 2  | -8.5053795 | -6.9526959 | 3.58E-12    | 1.41E-10    | Inhibition of DPP4 with sitagliptin can delay amyloid deposition by increasing GLP-1 levels in the brain (D'Amico et al., 2010), and GLP-1 receptor stimulation can lower Abeta secretion, <i>in vitro</i> (Li et al., 2010). However, if DPP4 downregulation in our study is resulting in increased GLP-1 levels, since GLP-1 is a hormone, not an enzyme, we would expect that GLP-1 signalling would alter the transcript levels of proteins involved with APP/Abeta processing, rather than directly activate/deactivate available enzymes with mRNA levels that are consistent between the two cell lines.                                                                                                                                                                                                                                                                                                                                                                                                                                                                         | No  |
| <b>MEGF10</b>   | ENSG00000145794 | 5  | -11.550718 | -17.774019 | 1.12E-70    | 8.52E-68    | The MEGF10 protein has been shown to function as a phagocytosis receptor for the uptake of Abeta (Singh et al., 2010). If MEGF10 were responsible for the decrease in extracellular Abeta, we would expect to see higher levels of MEGF10, which would likely result in increased phagocytosis of Abeta, and thus decreased extracellular levels of the peptides; however, the opposite of this was observed.                                                                                                                                                                                                                                                                                                                                                                                                                                                                                                                                                                                                                                                                           | No  |

## References:

1. Bai, G. *et al.* (2011) 'Presenilin-dependent receptor processing is required for axon guidance', *Cell*, 144(1), pp. 106–118. doi: 10.1016/j.cell.2010.11.053.
2. Baranello, R. *et al.* (2015) 'Amyloid-Beta Protein Clearance and Degradation (ABCD) Pathways and their Role in Alzheimer's Disease', *Current Alzheimer Research*. Bentham Science Publishers Ltd., 12(1), pp. 32–46. doi: 10.2174/1567205012666141218140953.
3. Beecham, G. W. *et al.* (2014) 'Genome-Wide Association Meta-analysis of Neuropathologic Features of Alzheimer's Disease and Related Dementias', *PLoS Genetics*. Public Library of Science, 10(9). doi: 10.1371/journal.pgen.1004606.
4. Blacher, E. *et al.* (2015) 'Alzheimer's disease pathology is attenuated in a CD38-deficient mouse model', *Annals of Neurology*. John Wiley and Sons Inc., 78(1), pp. 88–103. doi: 10.1002/ana.24425.
5. Blomqvist, M. E. L. *et al.* (2004) 'Genetic variation in CTNNA3 encoding alpha-3 catenin and Alzheimer's disease', *Neuroscience Letters*, 358(3), pp. 220–222. doi: 10.1016/j.neulet.2004.01.032.
6. Bour, A. *et al.* (2004) 'A secreted form of the beta-amyloid precursor protein (sAPP695) improves spatial recognition memory in OF1 mice.', *Neurobiology of learning and memory*, 81(1), pp. 27–38. Available at: <http://www.ncbi.nlm.nih.gov/pubmed/14670356> (Accessed: 21 August 2018).
7. Busby, V. *et al.* (2004) 'Alpha-T-catenin is expressed in human brain and interacts with the Wnt signaling pathway but is not responsible for linkage to chromosome 10 in Alzheimer's disease.', *Neuromolecular medicine*, 5(2), pp. 133–46. doi: 10.1385/NMM:5:2:133.
8. Cantarella, G. *et al.* (2015) 'Neutralization of TNFSF10 ameliorates functional outcome in a murine model of Alzheimer's disease', *Brain*. Oxford University Press, 138(1), pp. 203–216. doi: 10.1093/brain/awu318.
9. Chang, X. *et al.* (2019) 'Hyperpolarization-activated cyclic nucleotide-gated channels: An emerging role in neurodegenerative diseases', *Frontiers in Molecular Neuroscience*. Frontiers Media S.A. doi: 10.3389/fnmol.2019.00141.
10. Chini, E. N. *et al.* (2002) 'CD38 is the major enzyme responsible for synthesis of nicotinic acid - Adenine dinucleotide phosphate in mammalian tissues', *Biochemical Journal*. Biochem J, 362(1), pp. 125–130. doi: 10.1042/0264-6021:3620125.
11. Choi, H. Y. *et al.* (2013) 'APP interacts with LRP4 and agrin to coordinate the development of the neuromuscular junction in mice', *eLife*. eLife Sciences Publications, Ltd, 2(2). doi: 10.7554/elife.00220.
12. Crews, L. *et al.* (2010) 'Increased BMP6 levels in the brains of Alzheimer's disease patients and APP transgenic mice are accompanied by impaired neurogenesis', *Journal of Neuroscience*, 30(37), pp. 12252–12262. doi: 10.1523/JNEUROSCI.1305-10.2010.
13. D'Amico, M. *et al.* (2010) 'Long-term inhibition of dipeptidyl peptidase-4 in Alzheimer's prone mice.', *Experimental gerontology*, 45(3), pp. 202–7. doi: 10.1016/j.exger.2009.12.004.
14. Dard, R. F., Dahan, L. and Rampon, C. (2019) 'Targeting hippocampal adult neurogenesis using transcription factors to reduce Alzheimer's disease-associated memory impairments', *Hippocampus*. John Wiley and Sons Inc., 29(7), pp. 579–586. doi: 10.1002/hipo.23052.
15. Das, B. and Yan, R. (2019) 'A Close Look at BACE1 Inhibitors for Alzheimer's Disease Treatment', *CNS Drugs*. Springer International Publishing, pp. 251–263. doi: 10.1007/s40263-019-00613-7.
16. Dobin, A. and Gingeras, T. R. (2016) 'Optimizing RNA-seq mapping with STAR', in *Methods in Molecular Biology*. Humana Press Inc., pp. 245–262. doi: 10.1007/978-1-4939-3572-7\_13.
17. Dunckley, T. *et al.* (2006) 'Gene expression correlates of neurofibrillary tangles in Alzheimer's disease', *Neurobiology of Aging*, 27(10), pp. 1359–1371. doi: 10.1016/j.neurobiolaging.2005.08.013.
18. Efthymiou, A. G. and Goate, A. M. (2017) 'Late onset Alzheimer's disease genetics implicates microglial pathways in disease risk', *Molecular Neurodegeneration*. BioMed Central Ltd. doi: 10.1186/s13024-017-0184-x.
19. Elkamhawy, A. *et al.* (2017) 'Design, synthesis, biological evaluation and molecular modelling of 2-(2-aryloxyphenyl)-1,4-dihydroisoquinolin-3(2H)-ones: A novel class of TSPO ligands modulating amyloid- $\beta$ -induced mPTP opening', *European Journal of Pharmaceutical Sciences*. Elsevier B.V., 104, pp. 366–381. doi: 10.1016/j.ejps.2017.04.015.
20. Ertekin-Taner, N. *et al.* (2003) 'Fine mapping of the a-T catenin gene to a quantitative trait locus on chromosome 10 in late-onset Alzheimer's disease pedigrees', *Hum Mol Genet.*, 12(23), pp. 3133–43. doi: 10.1093/hmg/ddg343.
21. Ethell, D. W. and Buhler, L. A. (2003) 'Fas ligand-mediated apoptosis in degenerative disorders of the brain', *Journal of Clinical Immunology*, pp. 363–370. doi: 10.1023/A:1025317516396.

22. Evans, C. E. *et al.* (2020) 'ACE2 activation protects against cognitive decline and reduces amyloid pathology in the Tg2576 mouse model of Alzheimer's disease', *Acta Neuropathologica*. Springer, 139(3), pp. 485–502. doi: 10.1007/s00401-019-02098-6.
23. Falkevall, A. *et al.* (2006) 'Degradation of the amyloid  $\beta$ -protein by the novel mitochondrial peptidasome, PreP', *Journal of Biological Chemistry*, 281(39), pp. 29096–29104. doi: 10.1074/jbc.M602532200.
24. Good, P. F. *et al.* (2004) 'A role for semaphorin 3A signaling in the degeneration of hippocampal neurons during Alzheimer's disease', *Journal of Neurochemistry*, 91(3), pp. 716–736. doi: 10.1111/j.1471-4159.2004.02766.x.
25. Haass, C. and Selkoe, D. J. (1993) 'Cellular processing of beta-amyloid precursor protein and the genesis of amyloid beta-peptide.', *Cell*, 75(6), pp. 1039–42. Available at: <http://www.ncbi.nlm.nih.gov/pubmed/8261505> (Accessed: 21 August 2018).
26. Han, M. R., Schellenberg, G. D. and Wang, L. S. (2010) 'Genome-wide association reveals genetic effects on human A $\beta$ 42 and  $\tau$  protein levels in cerebrospinal fluids: A case control study', *BMC Neurology*, 10. doi: 10.1186/1471-2377-10-90.
27. Hermey, G. *et al.* (2019) 'Amyloidosis causes downregulation of SorLA, SorCS1 and SorCS3 expression in mice.', *Biological chemistry*. De Gruyter, 400(9), pp. 1181–1189. doi: 10.1515/hsz-2019-0146.
28. Hick, M. *et al.* (2015) 'Acute function of secreted amyloid precursor protein fragment APP<sub>s</sub> in synaptic plasticity.', *Acta neuropathologica*, 129(1), pp. 21–37. doi: 10.1007/s00401-014-1368-x.
29. Hocker, M. *et al.* (1996) *The Regulation of Histidine Decarboxylase Gene Expression*, *YALE JOURNAL OF BIOLOGY AND MEDICINE*.
30. Hoe, H.-S. *et al.* (2007) 'The Metalloprotease Inhibitor TIMP-3 Regulates Amyloid Precursor Protein and Apolipoprotein E Receptor Proteolysis', *Journal of Neuroscience*, 27(40), pp. 10895–10905. doi: 10.1523/JNEUROSCI.3135-07.2007.
31. Hoos, M. D. *et al.* (2007) 'Inhibition of familial cerebral amyloid angiopathy mutant amyloid  $\beta$ -protein fibril assembly by myelin basic protein', *Journal of Biological Chemistry*, 282(13), pp. 9952–9961. doi: 10.1074/jbc.M603494200.
32. Hoshino, T. *et al.* (2009) 'Prostaglandin E2 stimulates the production of amyloid- $\beta$  peptides through internalization of the EP4 receptor', *Journal of Biological Chemistry*, 284(27), pp. 18493–18502. doi: 10.1074/jbc.M109.003269.
33. Huang, R. and Poduslo, S. E. (2006) 'CYP19 haplotypes increase risk for Alzheimer's disease.', *Journal of medical genetics*. doi: 10.1136/jmg.2005.039461.
34. Jaszberenyi, M. *et al.* (2012) 'Beneficial effects of novel antagonists of GHRH in different models of Alzheimer's disease', *Aging*. Impact Journals LLC, 4(11), pp. 755–767. doi: 10.18632/aging.100504.
35. Jiang, T. T. *et al.* (2017) 'Serum amyloid A, protein Z, and C4b-binding protein  $\beta$  chain as new potential biomarkers for pulmonary tuberculosis', *PLoS ONE*. Public Library of Science, 12(3). doi: 10.1371/journal.pone.0173304.
36. Jun, G. *et al.* (2014) 'PLXNA4 is associated with Alzheimer disease and modulates tau phosphorylation', *Annals of Neurology*. John Wiley and Sons Inc., 76(3), pp. 379–392. doi: 10.1002/ana.24219.
37. Kleineidam, L. *et al.* (2020) 'PLCG2 protective variant p.P522R modulates tau pathology and disease progression in patients with mild cognitive impairment', *Acta Neuropathologica*. Springer Science and Business Media LLC. doi: 10.1007/s00401-020-02138-6.
38. Krohn, M. *et al.* (2011) 'Cerebral amyloid- $\beta$  proteostasis is regulated by the membrane transport protein ABCC1 in mice.', *The Journal of clinical investigation*. American Society for Clinical Investigation, 121(10), pp. 3924–31. doi: 10.1172/JCI57867.
39. Krohn, M. *et al.* (2015) 'Accumulation of murine amyloid- $\beta$  mimics early Alzheimer's disease', *Brain*, 138(8), pp. 2370–2382. doi: 10.1093/brain/awv137.
40. Lashkari, K. *et al.* (2018) 'A monoclonal antibody targeting amyloid  $\beta$  (A $\beta$ ) restores complement factor I bioactivity: Potential implications in age-related macular degeneration and Alzheimer's disease', *PLoS ONE*. Public Library of Science, 13(5). doi: 10.1371/journal.pone.0195751.
41. Lau, A. *et al.* (2017) 'Functional Amyloids and their Possible Influence on Alzheimer Disease', *Discoveries*. Applied Systems, srl, 5(4), p. e79. doi: 10.15190/d.2017.9.
42. Li, Y. *et al.* (2010) 'GLP-1 receptor stimulation reduces amyloid-beta peptide accumulation and cytotoxicity in cellular and animal models of Alzheimer's disease.', *Journal of Alzheimer's disease* :



- JAD. IOS Press, 19(4), pp. 1205–19. doi: 10.3233/JAD-2010-1314.
43. Liao, M.-C. *et al.* (2009) 'Degradation of amyloid beta protein by purified myelin basic protein.', *The Journal of biological chemistry*, 284(42), pp. 28917–25. doi: 10.1074/jbc.M109.050856.
  44. Liao, Y., Smyth, G. K. and Shi, W. (2014) 'FeatureCounts: An efficient general purpose program for assigning sequence reads to genomic features', *Bioinformatics*. Oxford University Press, 30(7), pp. 923–930. doi: 10.1093/bioinformatics/btt656.
  45. Lincoln, S. *et al.* (2013) 'LRRTM3 interacts with APP and BACE1 and has variants associating with late-onset Alzheimer's disease (LOAD).', *PLoS one*, 8(6), p. e64164. doi: 10.1371/journal.pone.0064164.
  46. Liu, S. *et al.* (2014) 'Conversion of A $\beta$ 43 to A $\beta$ 40 by the successive action of angiotensin-converting enzyme 2 and angiotensin-converting enzyme', *Journal of Neuroscience Research*. John Wiley and Sons Inc., 92(9), pp. 1178–1186. doi: 10.1002/jnr.23404.
  47. Livak, K. J. and Schmittgen, T. D. (2001) 'Analysis of relative gene expression data using real-time quantitative PCR and the 2- $\Delta\Delta$ CT method', *Methods*. Academic Press Inc., 25(4), pp. 402–408. doi: 10.1006/meth.2001.1262.
  48. Love, M. I., Huber, W. and Anders, S. (2014) 'Moderated estimation of fold change and dispersion for RNA-seq data with DESeq2', *Genome Biology*. BioMed Central Ltd., 15(12), p. 550. doi: 10.1186/s13059-014-0550-8.
  49. Luo, H. *et al.* (2019) 'Apelin-13 suppresses neuroinflammation against cognitive deficit in a streptozotocin-induced rat model of Alzheimer's disease through activation of BDNF-TrkB signaling pathway', *Frontiers in Pharmacology*. Frontiers Media S.A., 10(MAR). doi: 10.3389/fphar.2019.00395.
  50. Magdesian, M. H. *et al.* (2011) 'Secreted human amyloid precursor protein binds semaphorin 3a and prevents Semaphorin-Induced growth cone collapse', *PLoS ONE*, 6(7). doi: 10.1371/journal.pone.0022857.
  51. Maler, J. M. *et al.* (2006) 'Decreased circulating CD34+ stem cells in early Alzheimer's disease: Evidence for a deficient hematopoietic brain support?', *Molecular Psychiatry*, 11(12), pp. 1113–1115. doi: 10.1038/sj.mp.4001913.
  52. Massone, S. *et al.* (2011) 'RNA polymerase III drives alternative splicing of the potassium channel-interacting protein contributing to brain complexity and neurodegeneration', *Journal of Cell Biology*, 193(5), pp. 851–866. doi: 10.1083/jcb.201011053.
  53. Miyashita, A. *et al.* (2007) 'Genetic association of CTNNA3 with late-onset Alzheimer's disease in females', *Human Molecular Genetics*, 16(23), pp. 2854–2869. doi: 10.1093/hmg/ddm244.
  54. Moon, M. *et al.* (2013) 'Vitamin D-binding protein interacts with A $\beta$  and suppresses A $\beta$ -mediated pathology', *Cell Death and Differentiation*, 20(4), pp. 630–638. doi: 10.1038/cdd.2012.161.
  55. Morohashi, Y. *et al.* (2002) 'Molecular cloning and characterization of CALP/KChIP4, a novel EF-hand protein interacting with presenilin 2 and voltage-gated potassium channel subunit Kv4.', *The Journal of biological chemistry*, 277(17), pp. 14965–75. doi: 10.1074/jbc.M200897200.
  56. Noda, M. *et al.* (2014) 'FGF-2 released from degenerating neurons exerts microglial-induced neuroprotection via FGFR3-ERK signaling pathway', *Journal of Neuroinflammation*. BioMed Central Ltd., 11. doi: 10.1186/1742-2094-11-76.
  57. Oh, S. *et al.* (2018) 'sRAGE prolonged stem cell survival and suppressed RAGE-related inflammatory cell and T lymphocyte accumulations in an Alzheimer's disease model', *Biochemical and Biophysical Research Communications*. Elsevier B.V., 495(1), pp. 807–813. doi: 10.1016/j.bbrc.2017.11.035.
  58. Ohsawa, I. *et al.* (1999) 'Amino-terminal region of secreted form of amyloid precursor protein stimulates proliferation of neural stem cells.', *The European journal of neuroscience*, 11(6), pp. 1907–13. Available at: <http://www.ncbi.nlm.nih.gov/pubmed/10336659> (Accessed: 21 August 2018).
  59. Paracchini, L. *et al.* (2018) 'Exome sequencing in an Italian family with Alzheimer's disease points to a role for seizure-related gene 6 (SEZ6) rare variant R615H', *Alzheimer's Research and Therapy*. BioMed Central Ltd., 10(1). doi: 10.1186/s13195-018-0435-2.
  60. Pignoni, M. *et al.* (2016) 'Seizure protein 6 and its homolog seizure 6-like protein are physiological substrates of BACE1 in neurons', *Molecular Neurodegeneration*. BioMed Central Ltd., 11(1), pp. 1–18. doi: 10.1186/s13024-016-0134-z.
  61. Plagman, A. *et al.* (2019) 'Cholecystokinin and Alzheimer's disease: a biomarker of metabolic function, neural integrity, and cognitive performance', *Neurobiology of Aging*. Elsevier Inc., 76, pp. 201–207. doi: 10.1016/j.neurobiolaging.2019.01.002.
  62. Qin, W. *et al.* (2003) 'Cyclooxygenase (COX)-2 and COX-1 Potentiate  $\beta$ -Amyloid Peptide Generation

- through Mechanisms That Involve  $\gamma$ -Secretase Activity', *Journal of Biological Chemistry*, 278(51), pp. 50970–50977. doi: 10.1074/jbc.M307699200.
63. Rahman, M. R. *et al.* (2020) 'Identification of molecular signatures and pathways to identify novel therapeutic targets in Alzheimer's disease: Insights from a systems biomedicine perspective', *Genomics*. Academic Press Inc., 112(2), pp. 1290–1299. doi: 10.1016/j.ygeno.2019.07.018.
64. Rama, N. *et al.* (2012) 'Amyloid precursor protein regulates netrin-1-mediated commissural axon outgrowth', *Journal of Biological Chemistry*, 287(35), pp. 30014–30023. doi: 10.1074/jbc.M111.324780.
65. Reitz, C. *et al.* (2013) 'Independent and epistatic effects of variants in VPS10-d receptors on Alzheimer disease risk and processing of the amyloid precursor protein (APP)', *Translational Psychiatry*, 3. doi: 10.1038/tp.2013.13.
66. Ring, S. *et al.* (2007) 'The secreted beta-amyloid precursor protein ectodomain APPs alpha is sufficient to rescue the anatomical, behavioral, and electrophysiological abnormalities of APP-deficient mice.', *The Journal of neuroscience : the official journal of the Society for Neuroscience*, 27(29), pp. 7817–26. doi: 10.1523/JNEUROSCI.1026-07.2007.
67. Ruan, Y. *et al.* (2019) 'Kainic acid Induces production and aggregation of amyloid  $\beta$ -protein and memory deficits by activating inflammasomes in NLRP3- and NF- $\kappa$ B-stimulated pathways', *Aging*. Impact Journals LLC, 11(11), pp. 3795–3810. doi: 10.18632/aging.102017.
68. Sarkar, C. *et al.* (2020) 'PLA2G4A/cPLA2-mediated lysosomal membrane damage leads to inhibition of autophagy and neurodegeneration after brain trauma', *Autophagy*. Taylor and Francis Inc., 16(3), pp. 466–485. doi: 10.1080/15548627.2019.1628538.
69. Satoh, J. I. *et al.* (2017) 'Microglia express ABI3 in the brains of Alzheimer's disease and Nasu-Hakola disease', *Intractable and Rare Diseases Research*. International Advancement Center for Medicine and Health Research, 6(4), pp. 262–268. doi: 10.5582/irdr.2017.01073.
70. Selkoe, D. J. and Hardy, J. (2016) 'The amyloid hypothesis of Alzheimer's disease at 25 years', *EMBO Molecular Medicine*. EMBO, 8(6), pp. 595–608. doi: 10.15252/emmm.201606210.
71. Sierksma, A. *et al.* (2020) 'Novel Alzheimer risk genes determine the microglia response to amyloid- $\beta$  but not to TAU pathology', *EMBO Molecular Medicine*. EMBO, 12(3). doi: 10.15252/emmm.201910606.
72. Sim, P. L. and Heese, K. (2010) 'Ligand-dependent activation of the chimeric tumor necrosis factor receptor-amyloid precursor protein (APP) reveals increased app processing and suppressed neuronal differentiation', *NeuroSignals*, 18(1), pp. 9–23. doi: 10.1159/000242425.
73. Sims, R. *et al.* (2017) 'Rare coding variants in PLCG2, ABI3, and TREM2 implicate microglial-mediated innate immunity in Alzheimer's disease', *Nature Genetics*. Nature Publishing Group, 49(9), pp. 1373–1384. doi: 10.1038/ng.3916.
74. Singh, T. D. *et al.* (2010) 'MEGF10 functions as a receptor for the uptake of amyloid- $\beta$ ', *FEBS Letters*, 584(18), pp. 3936–3942. doi: 10.1016/j.febslet.2010.08.050.
75. Soleman, S. *et al.* (2013) 'Targeting the neural extracellular matrix in neurological disorders', *Neuroscience*, pp. 194–213. doi: 10.1016/j.neuroscience.2013.08.050.
76. Stefan, S. M. and Wiese, M. (2019) 'Small-molecule inhibitors of multidrug resistance-associated protein 1 and related processes: A historic approach and recent advances', *Medicinal Research Reviews*. John Wiley and Sons Inc., pp. 176–264. doi: 10.1002/med.21510.
77. Sun, L. *et al.* (2014) 'LIMK1 is involved in the protective effects of bone morphogenetic protein 6 against amyloid- $\beta$ -induced neurotoxicity in rat hippocampal neurons', *Journal of Alzheimer's Disease*. IOS Press, 42(2), pp. 543–554. doi: 10.3233/JAD-140231.
78. Tapella, L. *et al.* (2018) 'TGF- $\beta$ 2 and TGF- $\beta$ 3 from cultured  $\beta$ -amyloid-treated or 3xTg-AD-derived astrocytes may mediate astrocyte–neuron communication', *European Journal of Neuroscience*. Blackwell Publishing Ltd, 47(3), pp. 211–221. doi: 10.1111/ejn.13819.
79. Tarafdar, A. and Pula, G. (2018) 'The role of NADPH oxidases and oxidative stress in neurodegenerative disorders', *International Journal of Molecular Sciences*. MDPI AG. doi: 10.3390/ijms19123824.
80. Teng, T. *et al.* (2019) 'Cytosolic Phospholipase A 2 Facilitates Oligomeric Amyloid- $\beta$  Peptide Association with Microglia via Regulation of Membrane-Cytoskeleton Connectivity', *Molecular Neurobiology*. Humana Press Inc., 56(5), pp. 3222–3234. doi: 10.1007/s12035-018-1304-5.
81. Town, L. *et al.* (2009) 'The metalloendopeptidase gene Pitrm1 is regulated by hedgehog signaling in the developing mouse limb and is expressed in muscle progenitors', *Developmental Dynamics*, 238(12), pp. 3175–3184. doi: 10.1002/dvdy.22126.
82. Wang, H. *et al.* (2002) 'Foxa2 (HNF3 $\beta$ ) controls multiple genes implicated in metabolism-secretion

- coupling of glucose-induced insulin release', *Journal of Biological Chemistry*, 277(20), pp. 17564–17570. doi: 10.1074/jbc.M1111037200.
83. Woo, R. S. *et al.* (2012) 'Neuregulin-1 protects against neurotoxicities induced by Swedish amyloid precursor protein via the ErbB4 receptor', *Neuroscience*, 202, pp. 413–423. doi: 10.1016/j.neuroscience.2011.11.026.
84. Zaarur, N. *et al.* (2015) 'RuvbL1 and RuvbL2 enhance aggresome formation and disaggregate amyloid fibrils', *The EMBO Journal*. EMBO, 34(18), pp. 2363–2382. doi: 10.15252/embj.201591245.
85. Zong, Y. *et al.* (2015) 'MiR-29c regulates NAV3 protein expression in a transgenic mouse model of Alzheimer's disease', *Brain Research*. Elsevier, 1624, pp. 95–102. doi: 10.1016/j.brainres.2015.07.022.
86. Zota, V. *et al.* (2009) 'HLA-DR alleles in amyloid beta-peptide autoimmunity: a highly immunogenic role for the DRB1\*1501 allele.', *Journal of immunology (Baltimore, Md. : 1950)*. The American Association of Immunologists, 183(5), pp. 3522–30. doi: 10.4049/jimmunol.0900620.
